## Correction

# Correction: AMP Deaminase 3 Deficiency Enhanced 5'-AMP Induction of Hypometabolism

The PLOS ONE Staff

Errors occur in Figure 4A. The labels of the blue line and the red line are switched. The authors have provided a corrected version of Figure 4A here.

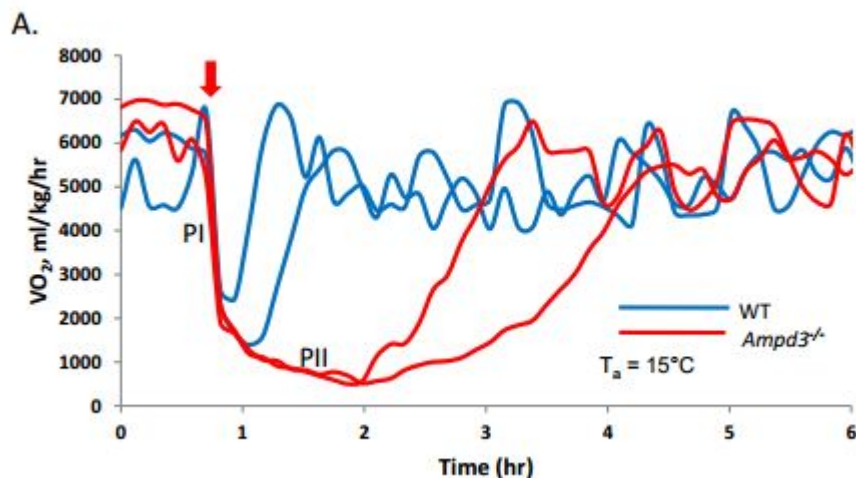

**Figure 4A. A.** *Ampd3*<sup>-/-</sup> mice stay in Phase II much longer than wild type mice when injected (arrow) with a lower dose of 5'-AMP (0.15 mg/g) and maintained at 15°C T<sub>a</sub>. Bar graphs of times that female (B, n = 12) and male (C, n = 3) mice remain in phase II are represented as number of minutes that VO<sub>2</sub> is below 1500 ml/kg/h. D & E. Trace and time-course quantitative analysis of VO<sub>2</sub> of wild type (n = 16) and *Ampd3*<sup>-/-</sup> (n = 15) mice given 5'-AMP (0.5 mg/gw) at T<sub>a</sub> of 15°C, respectively. Note: Mice aroused from deep hypometabolism were removed from CLAMS when their VO<sub>2</sub> have exceeded 1500 ml/kg/h. Error bars, mean ± SEM. doi:10.1371/journal.pone.0075418.g004

## Reference

- Daniels IS, O'Brien WG III, Nath V, Zhao Z, Lee CC (2013) AMP Deaminase 3 Deficiency Enhanced 5'-AMP Induction of Hypometabolism. PLoS ONE 8(9): e75418. doi:10.1371/journal.pone.0075418

**Citation:** The PLOS ONE Staff (2014) Correction: AMP Deaminase 3 Deficiency Enhanced 5'-AMP Induction of Hypometabolism. PLoS ONE 9(3): e91311. doi:10.1371/journal.pone.0091311

**Published:** March 7, 2014

**Copyright:** © 2014 The PLOS ONE Staff. This is an open-access article distributed under the terms of the Creative Commons Attribution License, which permits unrestricted use, distribution, and reproduction in any medium, provided the original author and source are credited.
